# Supplementary material for: An Updated Review of the Genus Humulus: A Valuable Source of Bioactive Compounds for Health and Disease Prevention
Source: MDPI journal article supplement (doi:10.3390/plants11243434), 2022-12-08
Supplement: s1 [file s1]

**Table S1.** Cluster composition of keyword co-occurrence network analysis from the cleaned dataset after Scopus search: “*Humulus lupulus*” AND “health”. Order of the keywords listed in each cluster: number of occurrences.

| Cluster Number<br>(colour) | Number of keywords | Selected keywords<br>(In order of number of occurrences)                                                                                                                                                                                                                                                                                                                                                                                                                                                                                                      |
|----------------------------|--------------------|---------------------------------------------------------------------------------------------------------------------------------------------------------------------------------------------------------------------------------------------------------------------------------------------------------------------------------------------------------------------------------------------------------------------------------------------------------------------------------------------------------------------------------------------------------------|
| 1<br>(red)                 | 35                 | human; nonhuman; unclassified drug; humulus lupulus extract; phytotherapy; drug efficacy; valerian; clinical trial; quality of life; anxiety; drug mechanism; drug safety; estrogen; valeriana officinalis; phytochemical; placebo; dietary supplement; herbaceous agent; herbal medicine; insomnia; medicinal plant; melissa officinalis; menopause; sleep disorder; alcohol; liver toxicity; actaea racemose; estrogen activity; hypericum perforatum; menopausal syndrome; osteoporosis; plants, medicinal; red clover; treatment duration; women's health |
| 2<br>(green)               | 34                 | humulus lupulus; humulus; hops; chemistry; beer; plant extract; high performance liquid chromatography; antioxidants; antioxidant; hop; humulus lupulus l; humulon; isolation and purification; antimicrobial activity; antioxidant activity; chromatography, high pressure liquid; polyphenols; bitter acids; mass spectrometry; antineoplastic agent; essential oils; fermentation; lupulon; phenols; prenylflavonoids; resveratrol; terpenes; antiinfective agent; bioactive compounds; extraction; health; liquid chromatography; metabolites; polyphenol |
| 3<br>(light blue)          | 26                 | Humans; xanthohumol; flavonoid; flavonoids; female; adult; phytoestrogen; propiophenones; propiophenone derivative; 8 prenylnaringenin; phytoestrogens; 8-prenylnaringenin; isoxanthohumol; flavanones; flavanone derivative; randomized controlled trial; dietary supplements; bioavailability; diet supplementation; human cell; middle aged; blood; cytotoxicity; human experiment; normal human; young adult                                                                                                                                              |
| 4<br>(yellow)              | 24                 | controlled study; plant extracts; metabolism; animals; drug effect; male; animal; mouse; animal experiment; mice; animal tissue; genetics; in vitro study; rat; animal model; enzyme activity; oxidative stress; antineoplastic activity; cancer; cell proliferation; comparative study; animal cell; cell line; gene expression                                                                                                                                                                                                                              |
| 5<br>(pink)                | 4                  | chemical structure; lipid metabolism; obesity; phytochemicals                                                                                                                                                                                                                                                                                                                                                                                                                                                                                                 |
