# Supplementary material for: An Updated Review of the Genus Humulus: A Valuable Source of Bioactive Compounds for Health and Disease Prevention
Source: Plants (Basel). 2022 Dec 8;11(24):3434. doi: 10.3390/plants11243434 (PMC9782902; doi:10.3390/plants11243434)
Supplement: Supplementary file 1 [file plants-11-03434-s001.zip]

Archive with 5 entries (5 files):
- SUPPLEMENTARY_MATERIALS_CARBONE_revised/FIGURE_S1a.png
- SUPPLEMENTARY_MATERIALS_CARBONE_revised/FIGURE_S1b.png
- SUPPLEMENTARY_MATERIALS_CARBONE_revised/FIGURE_S1c.png
- SUPPLEMENTARY_MATERIALS_CARBONE_revised/FIGURE_S2.png
- SUPPLEMENTARY_MATERIALS_CARBONE_revised/TABLE_S1.pdf
